# Supplementary material
Source: PubMed Central journal article supplement (PMC7612848)
Supplement: EMS120221-supplement-SI.pdf [file EMS120221-supplement-SI.pdf]

**Supplementary Video 1** | A tendon fascicle at baseline (unstretched condition), showing sparse spontaneous  $\text{Ca}^{2+}$  signals in tenocytes. See also corresponding Fig. 1b,c.

**Supplementary Video 2** | A tendon fascicle during tissue stretching from 0–10% strain, showing a tissue-wide  $\text{Ca}^{2+}$  response in tenocytes. See also corresponding Fig. 1b,c.

**Supplementary Video 3** | Propagation of  $\text{Ca}^{2+}$  signals to neighbouring cells, potentially through cell–cell communication.

**Supplementary Video 4** | Isolated human tenocytes showing  $\text{Ca}^{2+}$  signals on stimulation with 5-Pa shear stress. See also corresponding Fig. 2d.

**Supplementary Video 5** | A tendon fascicle stimulated with the PIEZO1-agonist Yoda1, showing a prompt  $\text{Ca}^{2+}$  response in tenocytes. See also corresponding Supplementary Fig. 6g.

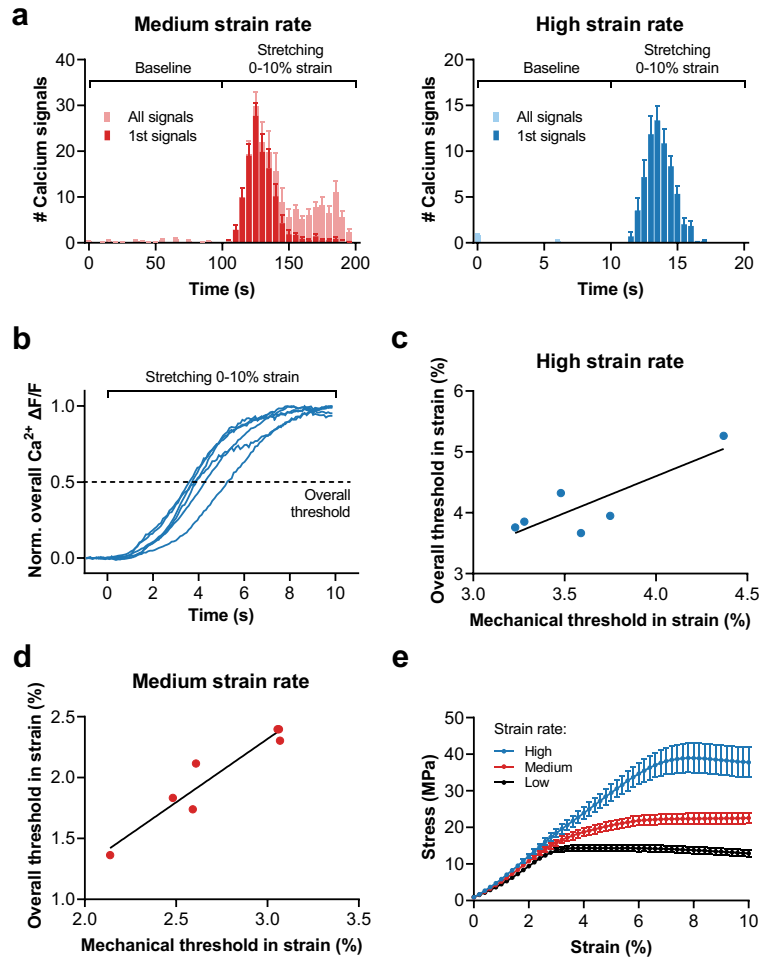

**Supplementary Fig. 1 | The mechanosensitive  $\text{Ca}^{2+}$  response in tendon explants and the normalized overall change in fluorescence intensity as an estimate of the mechanical threshold.** **a**, Quantification of intracellular  $\text{Ca}^{2+}$  elevations during stretching protocols from 0-10% strain at medium strain rate (0.1% strain/s,  $n=7$  fascicles) and high strain rate (1.0% strain/s,  $n=6$  fascicles). **b**, The overall change in  $\text{Ca}^{2+}$  fluorescence intensity (normalized to the maximum intensity) of tendon fascicles stretched at high strain rate. **c**, Significant correlation between the overall threshold and the mechanical threshold for the high strain rate data ( $y = 1.212x - 0.249$ ;  $R^2 = 0.715$ ;  $p = 0.034$ ) and **(d)** the medium strain rate data ( $y = 1.041x - 0.805$ ;  $R^2 = 0.913$ ;  $p < 0.001$ ). Hence, mechanical thresholds can be estimated with the overall threshold, which represents a straightforward approach. **e**, The mechanical data corresponding to the  $\text{Ca}^{2+}$  imaging experiments (see Fig. 1c and d) with tendon fascicles stretched at low, medium and high strain rate. Replicates are biological. Data are means $\pm$ SEM.

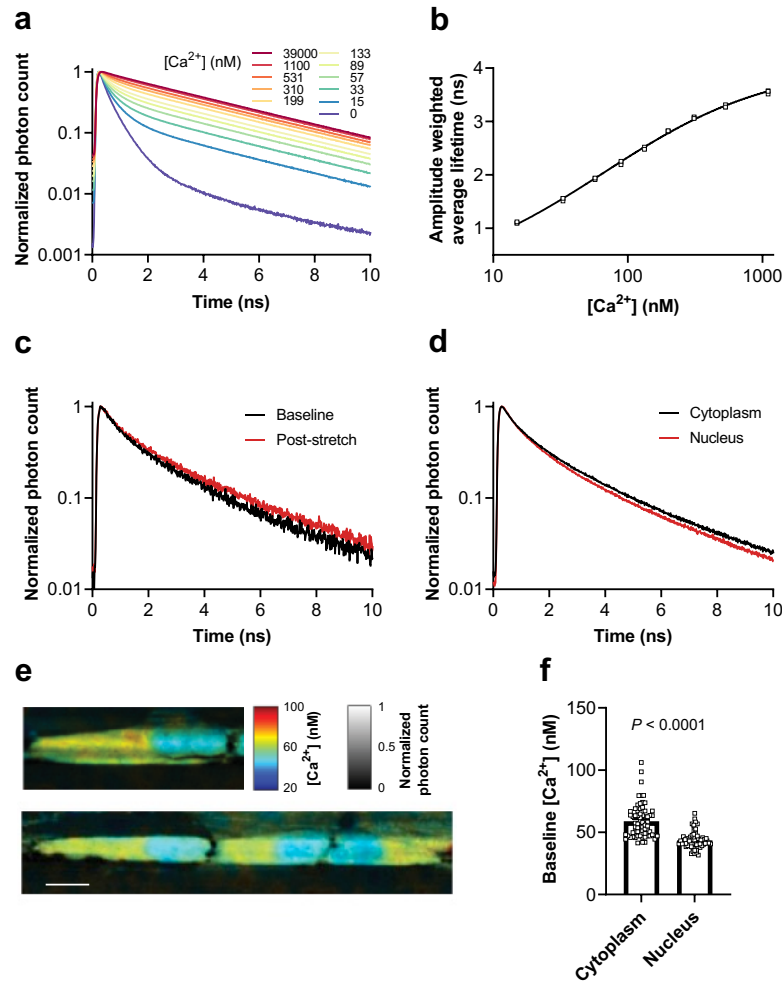

**Supplementary Fig. 2 | The OGB-1 FLIM calibration and the characterization of baseline [Ca<sup>2+</sup>] in tenocytes.** **a**, Normalized fluorescent lifetime decays of OGB-1 in calibration solutions at different [Ca<sup>2+</sup>]. **b**, The OGB-1 FLIM readout, obtained from a double-exponential tailfit of the lifetime decays and a subsequent nonlinear fitting with Hill slope of the amplitude weighted average lifetime ( $y = \frac{4.074 x^h}{65.87^h + x^h}$ ;  $h = 0.6935$ ;  $R^2 = 0.998$ ). **c**, Representative example of the normalized fluorescent lifetime decay measured in a tenocyte at baseline and post-stretch. Corresponding quantification is shown in Figure 1g. **d**, Subcellularly measured normalized fluorescent lifetime decays of a representative quiescent tenocyte. Corresponding quantification is shown in panel f. **e**, Heterogenous landscape of resting [Ca<sup>2+</sup>] in tenocytes (scale bar, 10  $\mu$ m). **f**, Subcellular quantification of [Ca<sup>2+</sup>] in quiescent tenocytes (n=66 cells from 8 fascicles), paired Student's t-test. Replicates are biological. Data are means $\pm$ SEM.

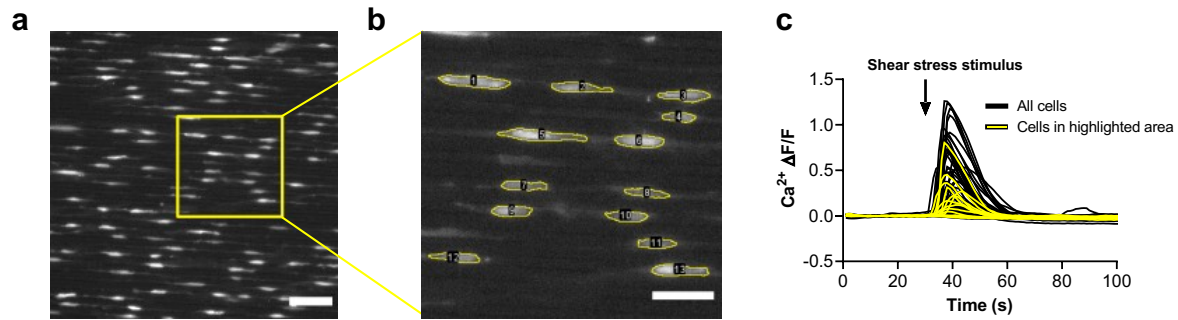

**Supplementary Fig. 3 | Analysis of  $\text{Ca}^{2+}$  images from shear stress experiments.** **a**, Entire field of view showing tenocytes seeded in the flow chamber and stained with Fluo-4 (scale bar, 100  $\mu\text{m}$ ). **b**, Segmentation of single cells (scale bar, 50  $\mu\text{m}$ ). **c**, Corresponding time traces of the fluorescence signals measured in the single segmented cells.

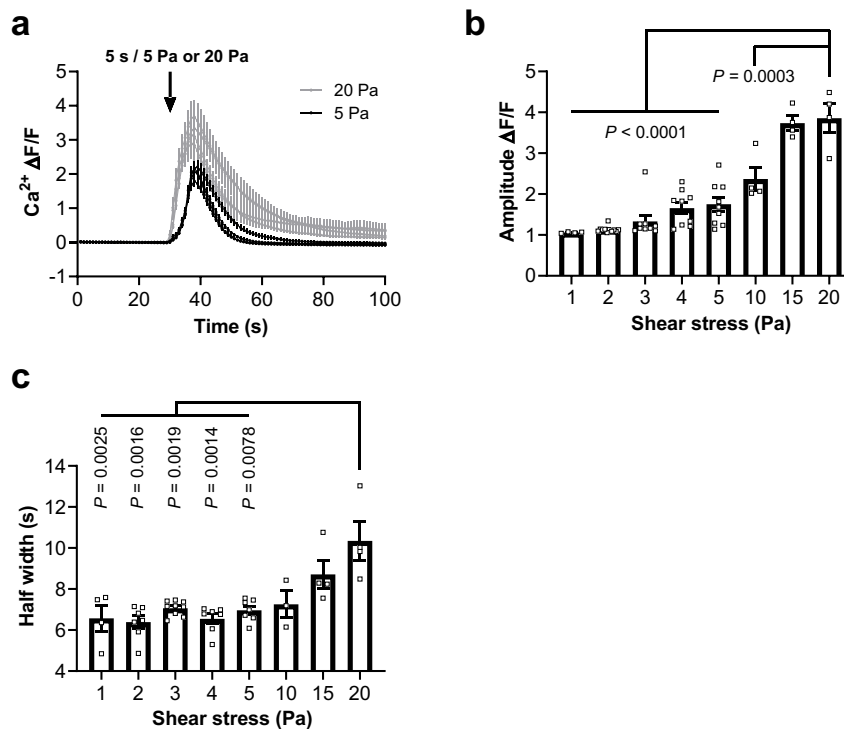

**Supplementary Fig. 4 | Magnitude dependency of the shear stress response in human tenocytes.** **a**, Time traces of  $\text{Ca}^{2+}$  signals induced by 5 Pa or 20 Pa shear stress. **b**, Median amplitude and **(c)** duration of the  $\text{Ca}^{2+}$  signals depend on the magnitude of shear stress stimulus (for each condition  $n \geq 4$  chambers, cells from human flexor digitorum tendons), one-way ANOVA with multiple comparisons (Tukey's test). Replicates are biological. Data are means  $\pm$  SEM.

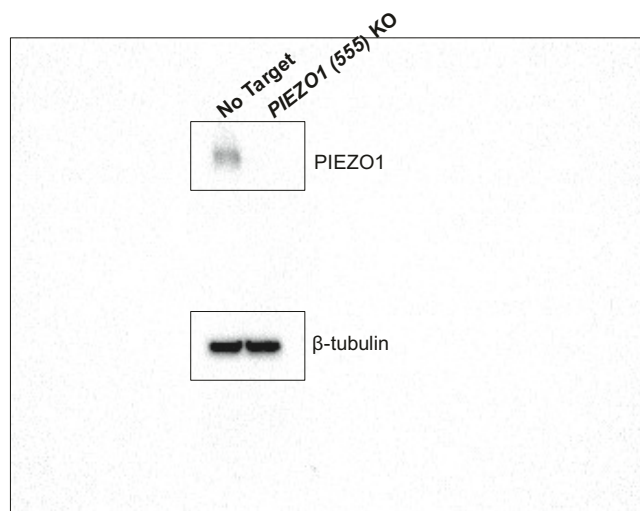

**Supplementary Fig. 5 |** Full scan of the Western blot shown in Fig. 3d.

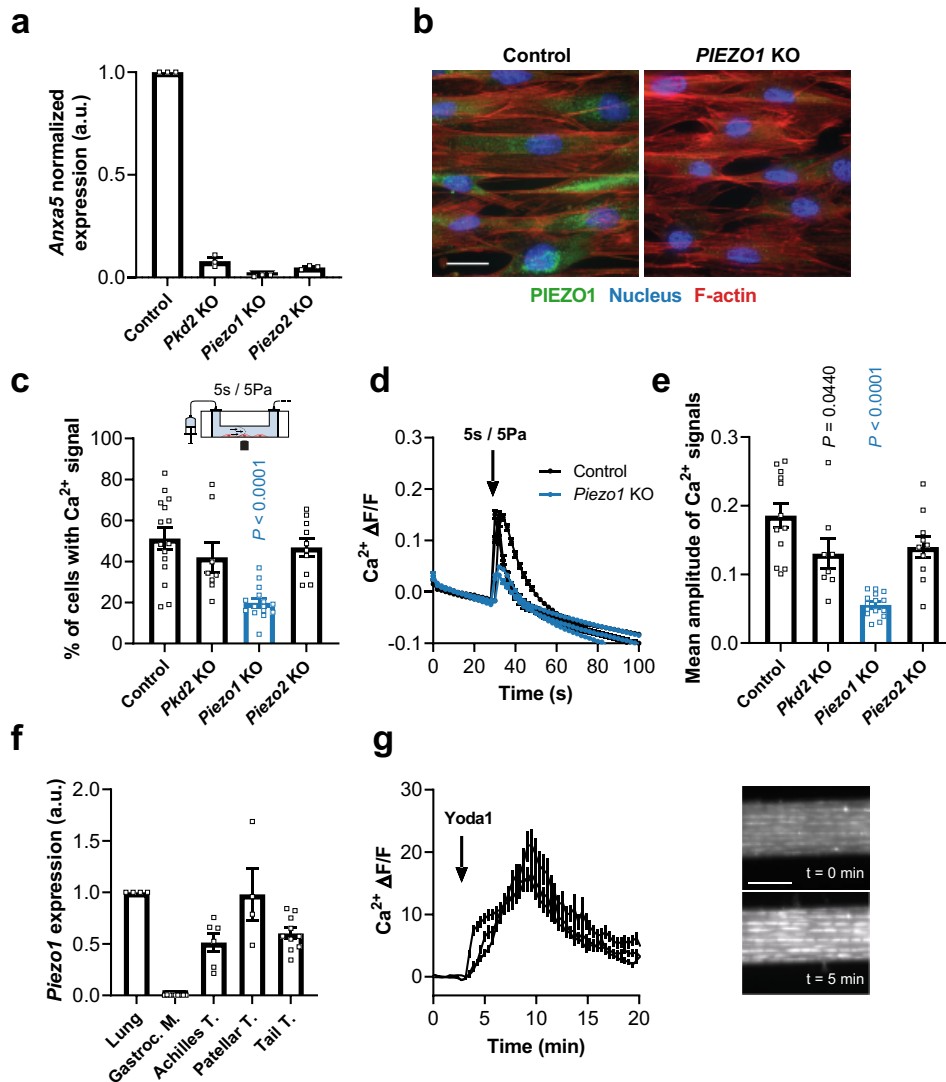

**Supplementary Fig. 6 | PIEZO1-mediated shear stress response of rat tenocytes.** **a**, Efficient CRISPR/Cas9-induced knockouts of the candidate genes. Quantitative PCR with a normalization to the expression of the corresponding gene in the control cells using the  $2^{-ddCT}$  method (data from  $n=3$  separate trials, cells from 3 rats) shows a significant reduction ( $P < 0.0001$ ) for all candidates, one-way ANOVA with multiple comparisons (Dunnett's test). **b**, Immunofluorescence images of control and *Piezo1* knockout tenocytes (scale bar, 20  $\mu\text{m}$ ). **c-e**, *Piezo1* knockout tenocytes show a reduced % of cells responding to shear stress (5 Pa for 5 s) and a diminished intracellular  $\text{Ca}^{2+}$  response (averaged over all single segmented cells). For each condition  $n \geq 8$  chambers were tested with cells from 3 rats, one-way ANOVA with multiple comparisons, (Dunnett's test). **f**, mRNA expression profile of *Piezo1* examined with quantitative PCR in various rat tissues including lung, muscle and tendons. Normalization to the lung, which was reported as one of the body organs with highest *Piezo1* expression<sup>16</sup>, using the  $2^{-ddCT}$  method. *Gapdh* was the reference gene (data from  $n=3$  separate trials, 3 rats). **g**, Intracellular  $\text{Ca}^{2+}$  time traces (averaged over all detected  $\text{Ca}^{2+}$  signals) in tendon fascicles stimulated with 50  $\mu\text{M}$  PIEZO1-agonist-Yoda1 ( $n=3$  fascicles). Onset of the Yoda1-stimulus is indicated by the arrow. Scale bar, 100  $\mu\text{m}$ . Replicates are biological. Data are means $\pm$ SEM.

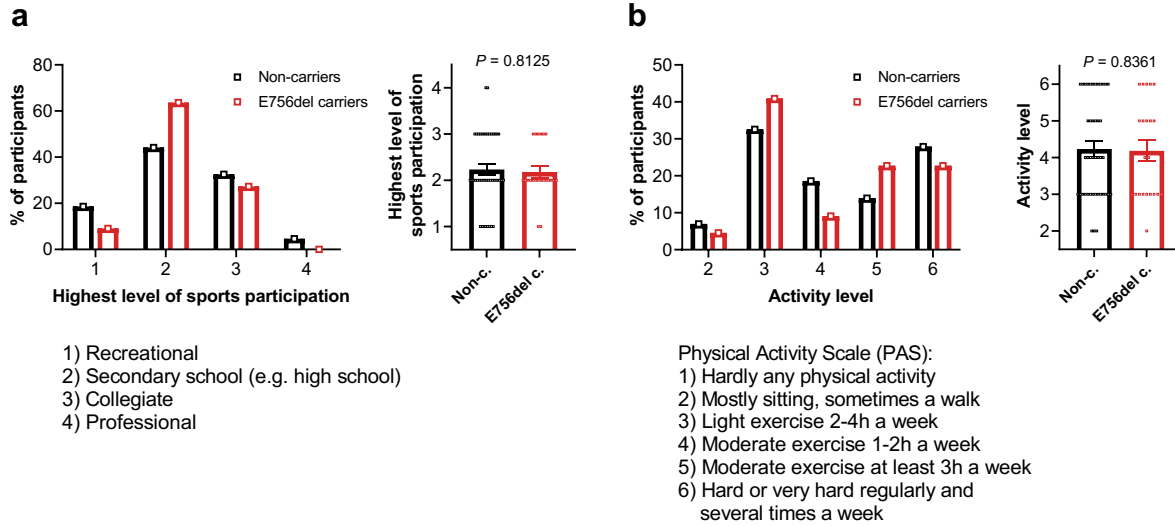

**Supplementary Fig. 7 | Similar levels of sports participation and physical activity between E756del carriers and non-carriers. a**, No difference in highest level of sports participation between the two groups. **b**, No difference in current activity level assessed with the Physical Activity Scale (PAS). Mann-Whitney test, n=22 E756del carriers and n=43 non-carriers. Replicates are biological. Data are means±SEM.

**Supplementary Table 1 | sgRNAs used for human and rat CRISPR/Cas9-mediated knockouts.**

| Target                | sgRNA Target Sequence |
|-----------------------|-----------------------|
| PIEZO1 (hu) 395 - 417 | CCTTGGAGGCCGCATCGGGT  |
| PIEZO1 (hu) 555-577   | GACCCCTATGTGTCGCGAGA  |
| PIEZO1 (hu) 786 - 808 | CAGCCGTGACCTCCGTGTAG  |
| PIEZO2 (hu) 1335-1357 | GGTAATGGGTTGCGTACCAC  |
| PKD2 (hu) 245-267     | AGATCGAGATGCAGCGCATC  |
| TMEM63A (hu) 701-723  | TTGTAGCAATAGGAGTCGTT  |
| TMEM63B (hu) 495-517  | CAGAGGTGAGACGCTCATAC  |
| TRPC1 (hu) 997-1019   | GAGGCTCGTCACTAGACGTA  |
| TRPM7 (hu) 1686-1708  | CTTCCAGTCTCGGAATGGTA  |
| TRPV4 (hu) 739-761    | CGGAGCGCACCGGCAACATG  |
| Hu Non-Targeting 40   | GACTTATAAACTCGCGCGGA  |
|                       |                       |
| Piezo1 (rat) 840-862  | TGCGCCGTGATCCGGAAGCG  |
| Piezo2 (rat) 479-501  | CGTGTCTGGGCGGCGTAGTC  |
| Pkd2 (rat) 243-265    | GGCATGGAGCCGCGACAACC  |

**Supplementary Table 2 | Forward and reverse primer sequences used for real-time PCR.**

| Forward Primer   | Forward Primer Sequence | Reverse Primer   | Reverse Primer Sequence |
|------------------|-------------------------|------------------|-------------------------|
| hu PIEZO1-269-F  | GTGCTCGGCGCGGTC         | hu PIEZO1-412-R  | GAGGCCGCATCGGGTG        |
| hu PIEZO1-490-F  | GATCTGCCTGCATATTGTGCC   | hu PIEZO1-573-R  | CCTATGTGTCGCGAGAGGG     |
| hu PIEZO1-708-F  | ATCCACGGGAGCTGGATGAT    | hu PIEZO1-807-R  | AGCCGTGACCTCCGTGTAG     |
| hu PIEZO2-1256-F | TGCAGGATGAGGGGACCAAA    | hu PIEZO2-1356-R | GTAATGGGTTGCGTACCACAG   |
| hu PKD2-960-F    | GTAAGGGAAGATGCAGCCCA    | hu PKD2-1063-R   | CTCGGAGTTGCCGATTCGT     |
| hu TMEM63A-578-F | CATCCACAGTCCTTCCTCCC    | hu TMEM63A-722-R | TGTAGCAATAGGAGTCGTTGGG  |
| hu TMEM63B-432-F | GCAGGAGAGGGACCGAGTG     | hu TMEM63B-516-R | AGAGGTGAGACGCTCATACCG   |
| hu TRPC1-911-F   | GAGGAACTAGCCCGGCAATG    | hu TRPC1-1019-R  | GAGGCTCGTCACTAGACGTA    |
| hu TRPM7-1580-F  | AGTGGCTGGTTGGATCCTTG    | hu TRPM7-1706-R  | TCCAGTCTCGGAATGGTAAGG   |
| hu TRPV4-652-F   | CATCTACGGGGAAGACCTGC    | hu TRPV4-768-R   | TGAACTCCCTCATGTTGCCG    |
| hu ANXA5-633-F   | CCTTCAGGCTAACAGAGACCC   | hu ANXA5-728-R   | CCCCATTTAAGTTCTCCAGCC   |
|                  |                         |                  |                         |
| rat Piezo1-710-F | ACGCCTCACAAGGAAAGCC     | rat Piezo1-858-R | CCGTGATCCGGAAGCGA       |
| rat Piezo2-426-F | CCTGGCGGTCTTTAGCTCAC    | rat Piezo2-500-R | GTGTCTGGGCGGCGTAG       |
| rat Pkd2-137-F   | GGGGCCTGGAGATTGAGAT     | rat Pkd2-262-R   | GGTTGTCGCGGCTCCAT       |
| rat Anxa5-526-F  | TCCTCCTCAGGCCAATAGAG    | rat Anxa5-642-R  | ACTTTTCTTCATCCGTCCCC    |
| rat Gapdh-50-F   | AGTGCCAGCCTCGTCTCATA    | rat Gapdh-180-R  | GAAGGGTTCGTTGATGGCAA    |
